# Supplementary material for: Haemanthus coccineus extract and its main bioactive component narciclasine display profound anti-inflammatory activities in vitro and in vivo
Source: PubMed Central journal article supplement (PMC4420604; doi:10.1111/jcmm.12493), 2015-03-05

## Supporting information

**Fig. S1**

**A**

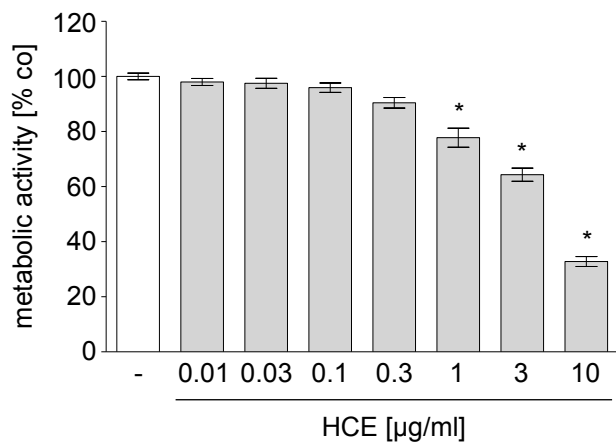

**B**

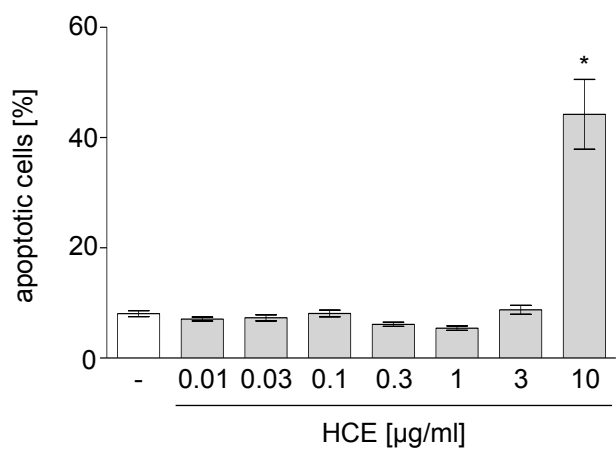

**Fig. S2**

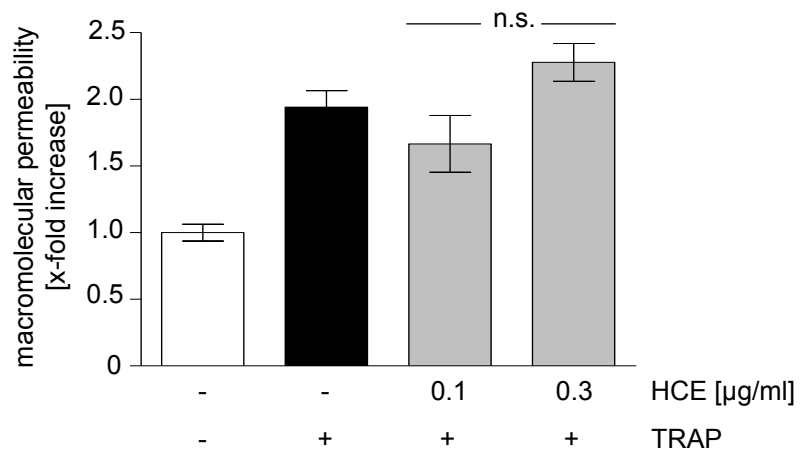

**Fig. S3**

**A**

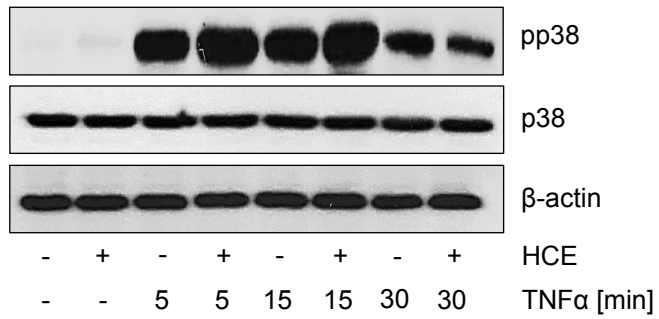

**B**

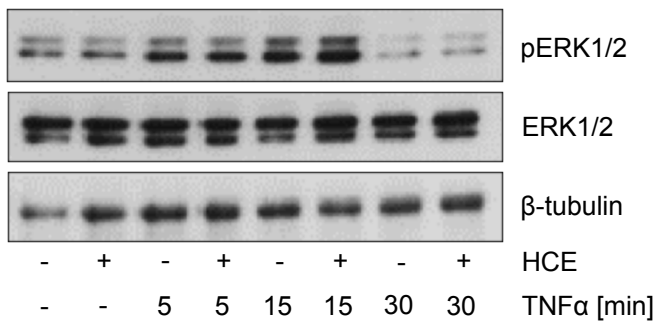

**C**

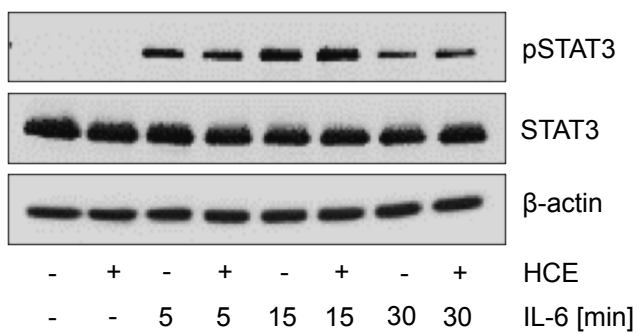

Supplement: jcmm0019-1021-sd1.pdf [file jcmm0019-1021-sd1.pdf]
